1     **Title: Root meristem growth factor 1 controls root meristem size through**  
2                                   **reactive oxygen species signaling**

3     **Authors:** Masashi Yamada<sup>1</sup>, Xinwei Han<sup>1†</sup>, Philip. N. Benfey<sup>1\*</sup>

4     **Affiliations:**

5     <sup>1</sup> Department of Biology and HHMI, Duke University, Durham, NC 27710, USA.

6     \*Correspondence to: philip.benfey@duke.edu

7     † Current address:

8     Constellation Pharmaceuticals, Cambridge, MA 02142, USA.

9     **Abstract:**

10    Stem cell niche and root meristem size are maintained by intercellular interactions and signaling  
11    networks of a plant peptide hormone, Root Meristem Growth Factor 1 (RGF1). How RGF1  
12    regulates root meristem development is an essential question to understand stem cell function.  
13    Although five receptors of RGF1 have recently been identified, the downstream signaling  
14    mechanism remains unknown. Here, we report a series of signaling events following RGF1  
15    action. The RGF1-receptor pathway controls distribution of reactive oxygen species (ROS)  
16    along the developmental zones of the *Arabidopsis* root. We identify a novel transcription factor,  
17    *RGF1 INDUCIBLE TRANSCRIPTION FACTOR 1 (RITF1)*, which plays a central role in  
18    mediating RGF1 signaling. Manipulating *RITF1* expression leads to redistribution of ROS along  
19    the root developmental zones. Changes in ROS distribution, in turn, enhance the stability of the  
20    PLETHORA2 (PLT2) protein, a master regulator of root stem cells. Taken together, our study  
21    clearly depicts a signaling cascade initiated by RGF1 and links the RGF1 peptide to ROS  
22    regulatory mechanisms.

23 **Text :**

24 Roots encounter various environmental conditions in soil and respond by altering their growth.  
25 The *Arabidopsis* root has a simple cylindrical structure. Each layer of the cylinder consists of a  
26 different cell-type, which is generated from a stem cell population at the root tip, and develops  
27 into mature cells along the longitudinal axis of the root. Developmental stages are defined as the  
28 meristematic zone, the elongation zone, and the differentiation zone. Root growth arises through  
29 controlled cell division in the meristematic zone and subsequent cell elongation and  
30 differentiation in the elongation and differentiation zones. During the transition to differentiation,  
31 most cells arrest division and increase their size through post-mitotic cell expansion. The size of  
32 the developmental zones is determined by intrinsic and extrinsic signals. In the *Arabidopsis* root,  
33 superoxide ( $O_2^-$ ) and hydrogen peroxide ( $H_2O_2$ ) exhibit distinct distribution patterns along the  
34 developmental zones<sup>1</sup>. Superoxide primarily accumulates in dividing cells in the meristematic  
35 zone, while hydrogen peroxide mainly accumulates in elongated cells in the differentiation  
36 zone<sup>1,2</sup>. The balance between  $O_2^-$  and  $H_2O_2$  modulates the transition from proliferation to  
37 differentiation<sup>2</sup>. The *UPBEAT1* (*UPBI*) gene regulates meristematic zone size by restricting  
38  $H_2O_2$  distribution in the elongation zone<sup>2</sup>. These findings have demonstrated that reactive oxygen  
39 species (ROS) are an intrinsic signal involved in establishing the size of the meristematic zone.

40 The RGF1 peptide is also able to control the size of the meristematic zone both as an  
41 intrinsic signal and when extrinsically applied<sup>3-5</sup>. External treatment with RGF1 increases the  
42 size of the meristematic zone, while the *rgf1/2/3* triple mutant has a smaller meristematic zone<sup>3</sup>.  
43 Five receptor-like kinases have been identified as RGF1 receptors<sup>6-8</sup>. Quintuple mutants of  
44 these receptors lack most of the cells in the root meristem and are insensitive to RGF1,  
45 demonstrating that the RGF signaling pathway controls root meristem size via these receptors<sup>8</sup>.  
46 The RGF1 signaling pathway controls the stability of the PLETHORA (PLT) 1/2 proteins<sup>3</sup>,

47 which are required for stem cell maintenance<sup>9</sup>. However, it is not known how RGF modulates  
48 the size of the meristematic zone and the stability of the PLT1/2 proteins. Here, we show that the  
49 RGF1 signaling pathway modulates ROS distribution along the three root developmental zones  
50 effectively controlling the size of the meristematic zone. Changes in ROS distribution result in  
51 changes in stability of the PLT2 protein. Transcriptome analysis after RGF1 treatment identified  
52 elevated expression of a meristematic zone-specific novel transcription factor (*RITF1*). Over-  
53 expression of the *RITF1* gene phenocopies the enlarged meristematic zone and altered  
54 distribution of ROS signaling upon RGF1 treatment.

55 It has been reported that RGF1 modulates meristematic zone size<sup>3,6-8</sup>. To confirm the effect of  
56 RGF1 treatment on the meristematic zone with greater specificity, we used the meristematic  
57 zone-specific marker HIGH PLOIDY2 (HPY2)-GFP protein<sup>10</sup> (Fig. 1a and b). HPY2-GFP was  
58 detected in an enlarged area 24h after RGF1 treatment (Fig. 1a-e) and this correlated with a  
59 larger meristematic zone (Fig. 1c and d). These results combined with defects in the meristematic  
60 zone in *rgf* and *rgf1 receptor (rgfr)* mutants suggest that RGF1 controls gene expression  
61 primarily in the meristematic zone. Therefore, we performed a meristematic zone-specific  
62 transcriptome analysis to uncover the molecular mechanism underlying the RGF1 signaling  
63 pathway. To identify primary target genes upon RGF1 treatment, we isolated the meristematic  
64 zone based on the *HPY2-GFP* signal one hour after RGF1 treatment (Fig. 1f).  
65 Since the expression of *HPY2-GFP* and the size of the meristematic zone were unchanged in this  
66 time period (data not shown), we can exclude the possibility that an enlarged meristem is the  
67 reason for elevated RNA levels. Expression of 583 genes was significantly altered in the RNA-  
68 seq data between RGF1 and mock treatment (FDR-adjusted p value < 0.1) (Extended Data).  
69 Most differentially expressed genes were positively regulated by RGF1 treatment. However, our

70 transcriptome analysis revealed specific down-regulation of *RGF1* itself, suggesting negative  
71 feed-back regulation (Extended Data). Significantly enriched Gene Ontology (GO) categories  
72 included “oxidoreductase activity” (p= 4.90E-06) and “oxidation reduction” (p= 4.90E-05)  
73 (Extended Data Fig. 1 and Extended Data). These data suggested that RGF1 might signal  
74 through a ROS intermediate to control the size of the meristematic zone.

75 To examine the relationship between RGF1 and ROS signaling, we analyzed the distribution  
76 of superoxide and hydrogen peroxide after RGF1 treatment. The specific indicator H<sub>2</sub>O<sub>2</sub>-3'-O-  
77 Acetyl-6'-O-pentafluorobenzenesulfonyl-2'-7'-difluorofluorescein-Ac (H<sub>2</sub>O<sub>2</sub>-BES-Ac)<sup>2</sup> for  
78 hydrogen peroxide exhibited lower fluorescence in the meristematic and elongation zones 24 h  
79 after RGF1 treatment (Fig. 2a and c). Superoxide signals were detected by nitroblue tetrazolium  
80 (NBT) staining<sup>1</sup> and observed more broadly in the meristematic and elongation zone 24 h after  
81 RGF1 treatment (Fig. 2b and d). To determine if these changes in ROS distributions depend on  
82 the RGF1 receptors, ROS signals were detected in the *rgfr1/2/3* triple mutant. The *rgfr1/2/3*  
83 triple mutant was insensitive to RGF1 and did not form a larger meristematic zone upon RGF1  
84 treatment (Fig.2e). Levels of H<sub>2</sub>O<sub>2</sub> and O<sub>2</sub><sup>-</sup> in the *rgfr1/2/3* triple mutant were comparable  
85 between mock and RGF1 treatments (Fig. 2e-h). These data are consistent with our hypothesis  
86 that the RGF1-receptor signaling pathway controls the size of the meristematic zone via ROS.

87 It was previously reported that the RGF1 signaling pathway regulates *PLT1/2* post-  
88 translationally<sup>6</sup>. We compared signals from a *PLT2* transcriptional fusion line; *promoter PLT2*  
89 (*pPLT2*)-*CFP*<sup>11</sup> and from a *PLT2* translational fusion line; *genomic PLT2* (*gPLT2*)-*YFP*<sup>11</sup>  
90 (Extended Data Fig. 2a-c) and observed broader localization of *gPLT2*-*YFP* signals 24 h after  
91 RGF1 treatment (Extended Data Fig. 2b-d). However, the levels and localization of *pPLT2*-*CFP*  
92 were comparable between Mock and RGF1 treatments (Extended Data Fig. 2a), even though

93 RGF1-treated roots had a larger meristematic zone. These experiments confirmed that RGF1  
94 regulates PLT2 post-translationally. We detected the highest levels of *gPLT2-YFP* and *pPLT2-*  
95 *CFP* in the cells around the QC (Extended Data Fig. 2a and b). The *gPLT2-YFP* signal gradually  
96 declined in the meristem after mock treatment (Extended Data Fig. 2b). However, after RGF1  
97 treatment, the *gPLT2-YFP* signal decreased more gradually and was broadly localized in a larger  
98 meristematic zone (Extended Data Fig. 2c). Since proteasome-dependent degradation of proteins  
99 occurs in the presence of elevated H<sub>2</sub>O<sub>2</sub> levels<sup>12,13</sup>, we hypothesized that broader localization of  
100 the PLT2 protein is due to the decreased H<sub>2</sub>O<sub>2</sub> and increased O<sub>2</sub><sup>-</sup> levels upon RGF1 treatment as  
101 shown in Figure 2. To determine if H<sub>2</sub>O<sub>2</sub> can decrease the stability of the PLT2 protein, we  
102 treated the *gPLT2-YFP* line with RGF1 and H<sub>2</sub>O<sub>2</sub>. H<sub>2</sub>O<sub>2</sub> treatment inhibited the size increase of  
103 the meristem upon RGF1 treatment (Extended Data Fig. 3d and e). Furthermore, *gPLT2-YFP*  
104 signals were not localized as broadly in roots co-treated with RGF1 and H<sub>2</sub>O<sub>2</sub> as compared with  
105 roots only treated with RGF1 (Extended Data Fig. 3b and c). These results are consistent with  
106 our hypothesis that lower H<sub>2</sub>O<sub>2</sub> levels enhance the stability of the PLT2 protein. To further probe  
107 the relationship between PLT2 protein stability and ROS, we measured *gPLT2-YFP*, O<sub>2</sub><sup>-</sup>, and  
108 H<sub>2</sub>O<sub>2</sub> in a shorter time course (4-10h) after RGF1 treatment. At 6 h after RGF1 treatment, we  
109 began to detect broader localization of *gPLT2-YFP* (Fig. 3a and b, Extended Data Fig. 4). At the  
110 same time, increased superoxide levels, as indicated by broader staining with NBT, were  
111 observed in the meristematic zone (Fig. 3g and h) along with lower signals of H<sub>2</sub>O<sub>2</sub>-BES-Ac in  
112 the distal side of the meristematic zone (Fig. 3m and n, white arrows). At 8 h and 10 h after  
113 RGF1 treatment, expanded *gPLT2-YFP* expression and O<sub>2</sub><sup>-</sup> signals correlated with declining  
114 H<sub>2</sub>O<sub>2</sub> signals (Fig. 3c-f, 3i-l, 3o-r and Extended Data Fig. 4a-c). These data indicate that RGF1  
115 treatment increases root meristem size and PLT2 protein stability by modulating ROS levels.

116 To identify for downstream factors that mediate the RGF1/ROS signaling pathway, we  
117 combined our RGF1 treatment transcriptome data with our previously published transcriptome  
118 data from the three root developmental zones<sup>14</sup>. We looked for genes whose expression was  
119 induced by RGF1 and specific to the meristematic zone. The *PLANT AT-RICH SEQUENCE and*  
120 *ZINC-BINDING TRANSCRIPTION FACTOR (PLATZ) FAMILY PROTEIN* gene (AT2G12646)  
121 is strongly expressed in the meristematic zone with lower expression in the elongation zone and  
122 greatly reduced expression in the differentiation zone (Extended Data Fig. 5a). As this gene has  
123 not been characterized, we named it *RGF1 INDUCIBLE TRANSCRIPTION FACTOR 1 (RITF1)*.  
124 Expression of *RITF1* increased approximately 2-fold after 1 h of RGF1 treatment (Extended  
125 Data and Extended Data Fig. 5b). To understand its function, *RITF1* was inducibly over-  
126 expressed using the estradiol inducible promoter system<sup>15</sup>. After 24 h of 10 $\mu$ M  $\beta$ -estradiol  
127 treatment, the meristematic zone became enlarged and the number of cells increased as compared  
128 with mock treatment (Fig. 4a and b). These phenotypes are very similar to RGF1 treated roots.  
129 Changes in ROS levels could also be detected in the *RITF1* over-expression line (Fig. 4c-4f).  
130 H<sub>2</sub>O<sub>2</sub> levels declined in all three developmental zones upon estradiol treatment (Fig. 4c and 4d).  
131 Furthermore, ectopic over-expression of *RITF1* enhanced O<sub>2</sub><sup>-</sup> signals in a broader area in the  
132 meristematic zone (Fig. 4e) and ectopic O<sub>2</sub><sup>-</sup> signals were detected in the elongation and  
133 differentiation zone (Fig. 4e, a blue arrow and 4f), where RGF1 receptors are not expressed<sup>6</sup>.  
134 This suggests that the *RITF1* gene may control ROS levels without other downstream regulators  
135 of the RGF1 signaling pathway.

136 The larger meristematic zone and alteration of ROS signals by over-expression of *RITF1*  
137 strongly suggest that the *RITF1* gene is a primary regulator controlling ROS signaling and  
138 meristem size in the RGF1 signaling pathway. Furthermore, the *ritf1* mutant (T-DNA insertion

139 line) has a root growth defect with a smaller meristematic zone (Extended Data Fig. 5c and 5d),  
140 and exhibits resistance to RGF1 (Extended Data Fig. 5d and 5e). Taken together, these results  
141 indicate that RGF1 modulates ROS levels and root meristem size by controlling expression of  
142 the *RITF1* gene.

143 We have previously reported that UPB1 reduces H<sub>2</sub>O<sub>2</sub> levels and controls meristem size by  
144 down-regulating peroxidase genes in the elongation zone<sup>2</sup>. Our transcriptome analysis didn't find  
145 significant changes in *UPB1* expression upon RGF1 treatment (Extended Data). We did find  
146 elevated expression of 5 peroxidase genes (Extended Data), but these are not downstream targets  
147 of *UPB1*<sup>2</sup>, suggesting that RGF1 regulates meristem size independently of *UPB1*. However, it is  
148 still possible that RGF1 controls meristem size via these peroxidases. To determine if the  
149 peroxidase genes upregulated by RGF1 play a role in meristem size control in the RGF1  
150 signaling pathway, we over-expressed two of them (At5g39580 and At4g08780). In neither case  
151 did we observe a larger meristematic zone (data not shown).

152 Identification of the RGF1 peptide and its receptors has provided a novel pathway for  
153 regulation of root growth<sup>3-8</sup>. Initially, it was shown that this signaling pathway regulates root  
154 meristem size by enhancing PLT1/2 stability<sup>3,6,8</sup>. However, the underlying mechanism was not  
155 elucidated. We show that RGF1 can modulate ROS levels in the meristematic zone over  
156 relatively short time periods and that longer RGF1 treatment results in altered distributions of  
157 ROS along the developmental zones of the root. Moreover, PLT2 protein localization correlates  
158 with ROS distribution and elevated H<sub>2</sub>O<sub>2</sub> levels reduce the stability of the PLT2 protein even in  
159 the presence of RGF. Finally, we identified a novel transcription factor, *RITF1*, that is induced  
160 by RGF1 in the meristematic zone and can alter ROS levels and meristem size. Taken together,

161 our results show that the RGF1 signaling pathway modulates ROS levels and distribution by up-  
162 regulating the *RITF1* gene in the meristematic zone.

163 **Figures:**

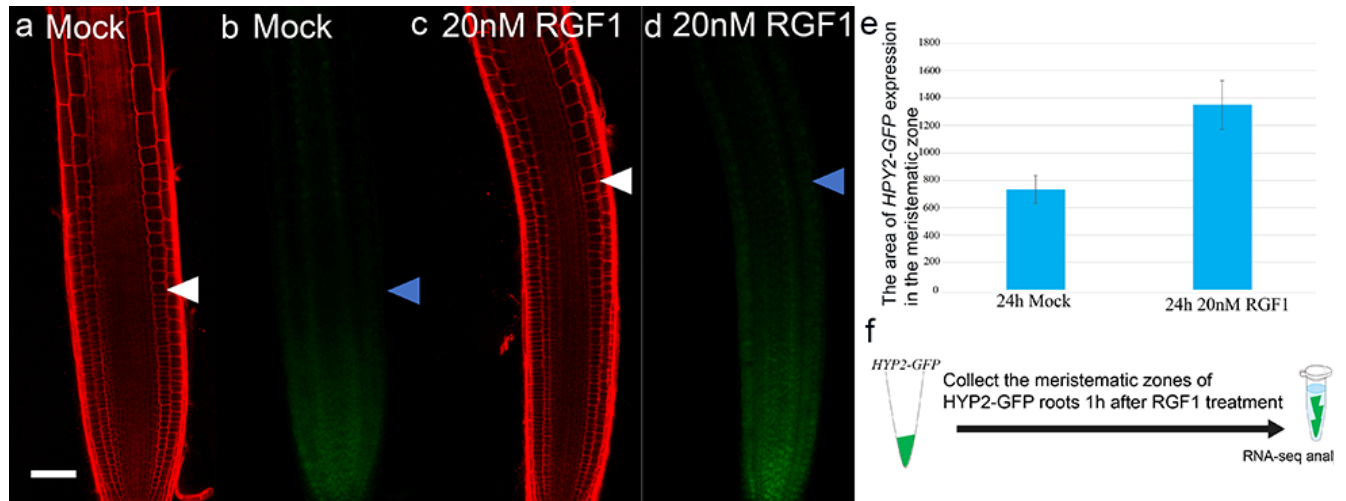

164  
165 **Figure 1. Expression of meristematic zone marker and transcriptome analysis upon RGF1**  
166 **treatment.** Confocal images of *HPY2-GFP* are shown 24 h after treatments with water (mock) (a  
167 and b) and 20 nM RGF1 (c and d). Seedlings were grown on MS medium for seven days before  
168 treatment. Propidium iodide stained roots (a and c); GFP signals (b and d). White and blue arrow  
169 heads indicate the junction between the meristematic zone and the elongation zone. Scale bar =  
170 50 μm (e) Area (μm<sup>2</sup>) of *HPY2-GFP* expression is shown. Error bars represent ± standard  
171 deviation (SD; n≥9). (f) Schematic of RNA extraction following RGF1 treatment.

172  
173  
174  
175  
176  
177  
178  
179



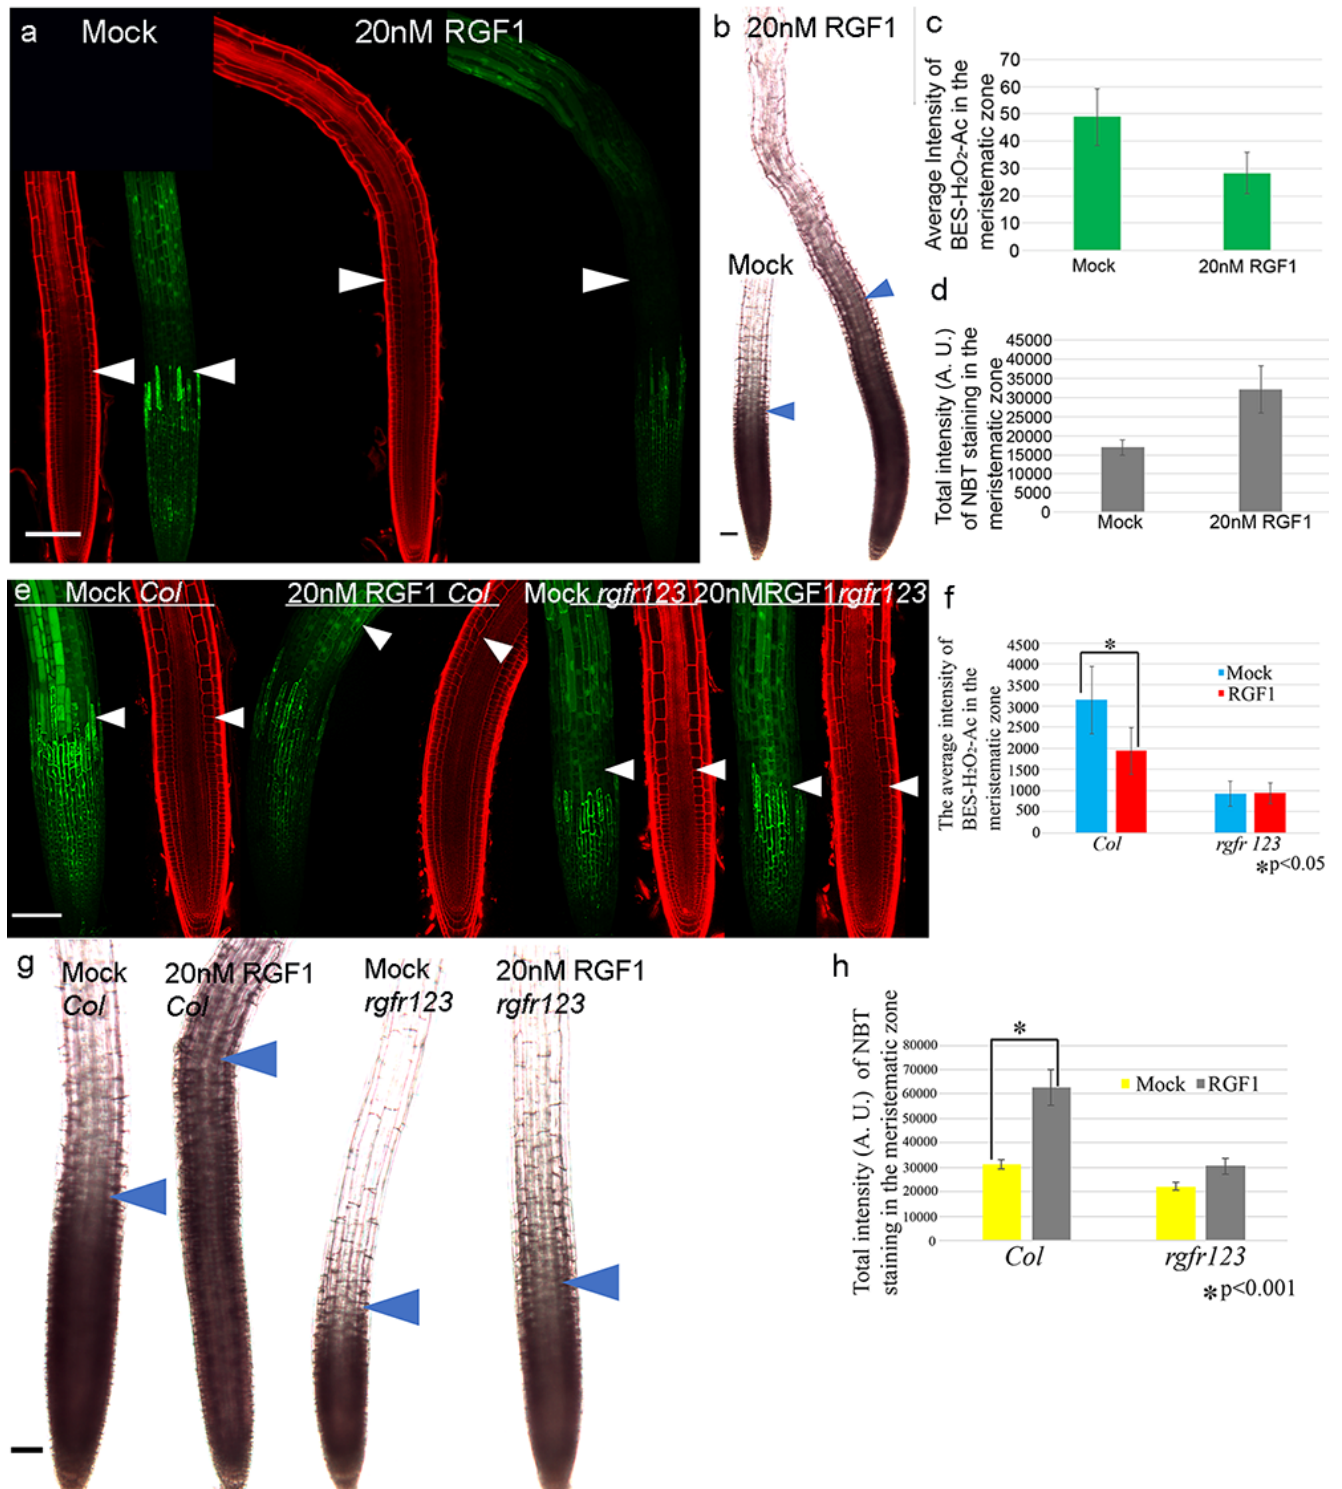

180

181 **Figure 2. Distribution of ROS levels upon RGF1 treatment.** (a). Confocal images of roots 24

182 h after treatment with Water (mock) and 20 nM RGF1 (right). Propidium iodide (PI) staining

183 (red images), H<sub>2</sub>O<sub>2</sub>-BES-Ac fluorescence (green images). (b) Roots stained with NBT 24 h after  
184 treatment with mock or 20 nM RGF1 (right). (c) Quantification of H<sub>2</sub>O<sub>2</sub>-BES-Ac intensity in  
185 meristematic zone (n = 6, ± SD; p < 0.003). (d) Quantification of NBT staining intensity  
186 (arbitrary units (A.U.) values) in meristematic zone (n ≥ 8, ± SD; p < 0.001). (e) Confocal images  
187 of roots 24 h after treatment with mock or 20 nM RGF1 in wild type (Col-0) (left four images) or  
188 the *rgfr 1/2/3* triple mutant (right four images). PI staining (red images). H<sub>2</sub>O<sub>2</sub>-BES-Ac  
189 fluorescence (green images). (f) Quantification of H<sub>2</sub>O<sub>2</sub>-BES-Ac staining intensity in the  
190 meristematic zone in wild type and the *rgfr 1/2/3* triple mutant (n = 5, ± SD; \*p < 0.05). (g)  
191 Roots stained with NBT 24 h after treatment with mock or 20 nM RGF1 in wild type (left two  
192 images) or the *rgfr 1/2/3* mutant (right two images). (h) Quantification of NBT staining intensity  
193 (A.U. values) in the meristematic zone in wild type or the *rgfr 1/2/3* triple mutant (n = 5, ± SD;  
194 \*p < 0.001). White and blue arrowheads indicate the junction between the meristematic zone and  
195 elongation zone. Scale bar = 50 μm. Seedlings were grown on MS medium for seven days before  
196 treatment.

197

198

199

200

201

202

203

204

205

206

207

208

209

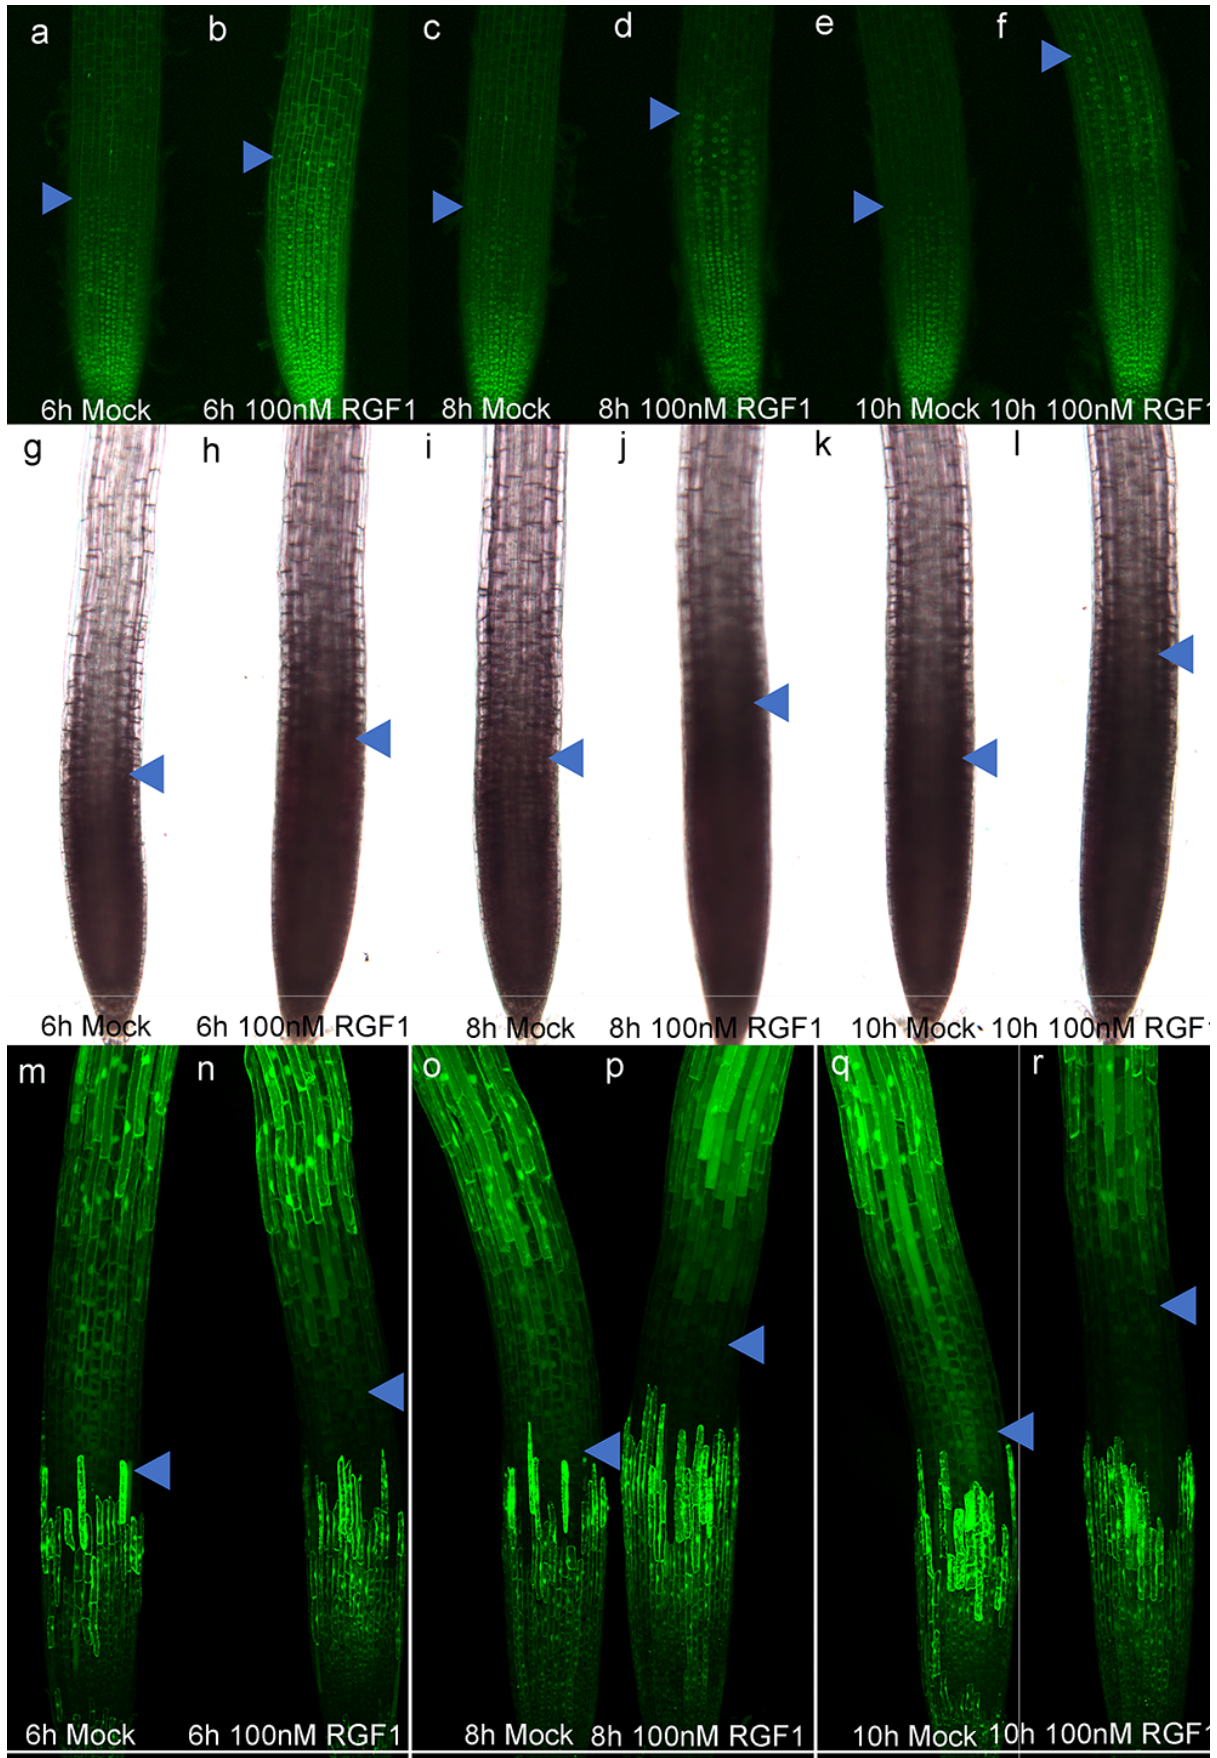

211 **Figure 3. Localization of gPLT2-YFP, NBT, and H<sub>2</sub>O<sub>2</sub>-BES-Ac after RGF1 treatment.**  
212 Localization of gPLT2-YFP, NBT, (M-R) H<sub>2</sub>O<sub>2</sub>-BES-Ac, 6 h after treatment with water (mock)  
213 (a, g, and m) or 100 nM RGF1 (b, h, and n), 8 h after treatment with mock (c, i, and o), or 100  
214 nM RGF1 (d, j, and p). 10h after treatment with mock (e, k, and q) or 100nM RGF1 (f, l, and r).  
215 Blue arrow heads indicate junction between meristematic zone and elongation zone. Scale bar =  
216 50 μm. Seedlings were grown on MS agar plates for seven days before treatment.

217  
218  
219  
220  
221  
222  
223  
224  
225  
226  
227  
228  
229  
230  
231  
232  
233  
234  
235  
236  
237  
238  
239  
240

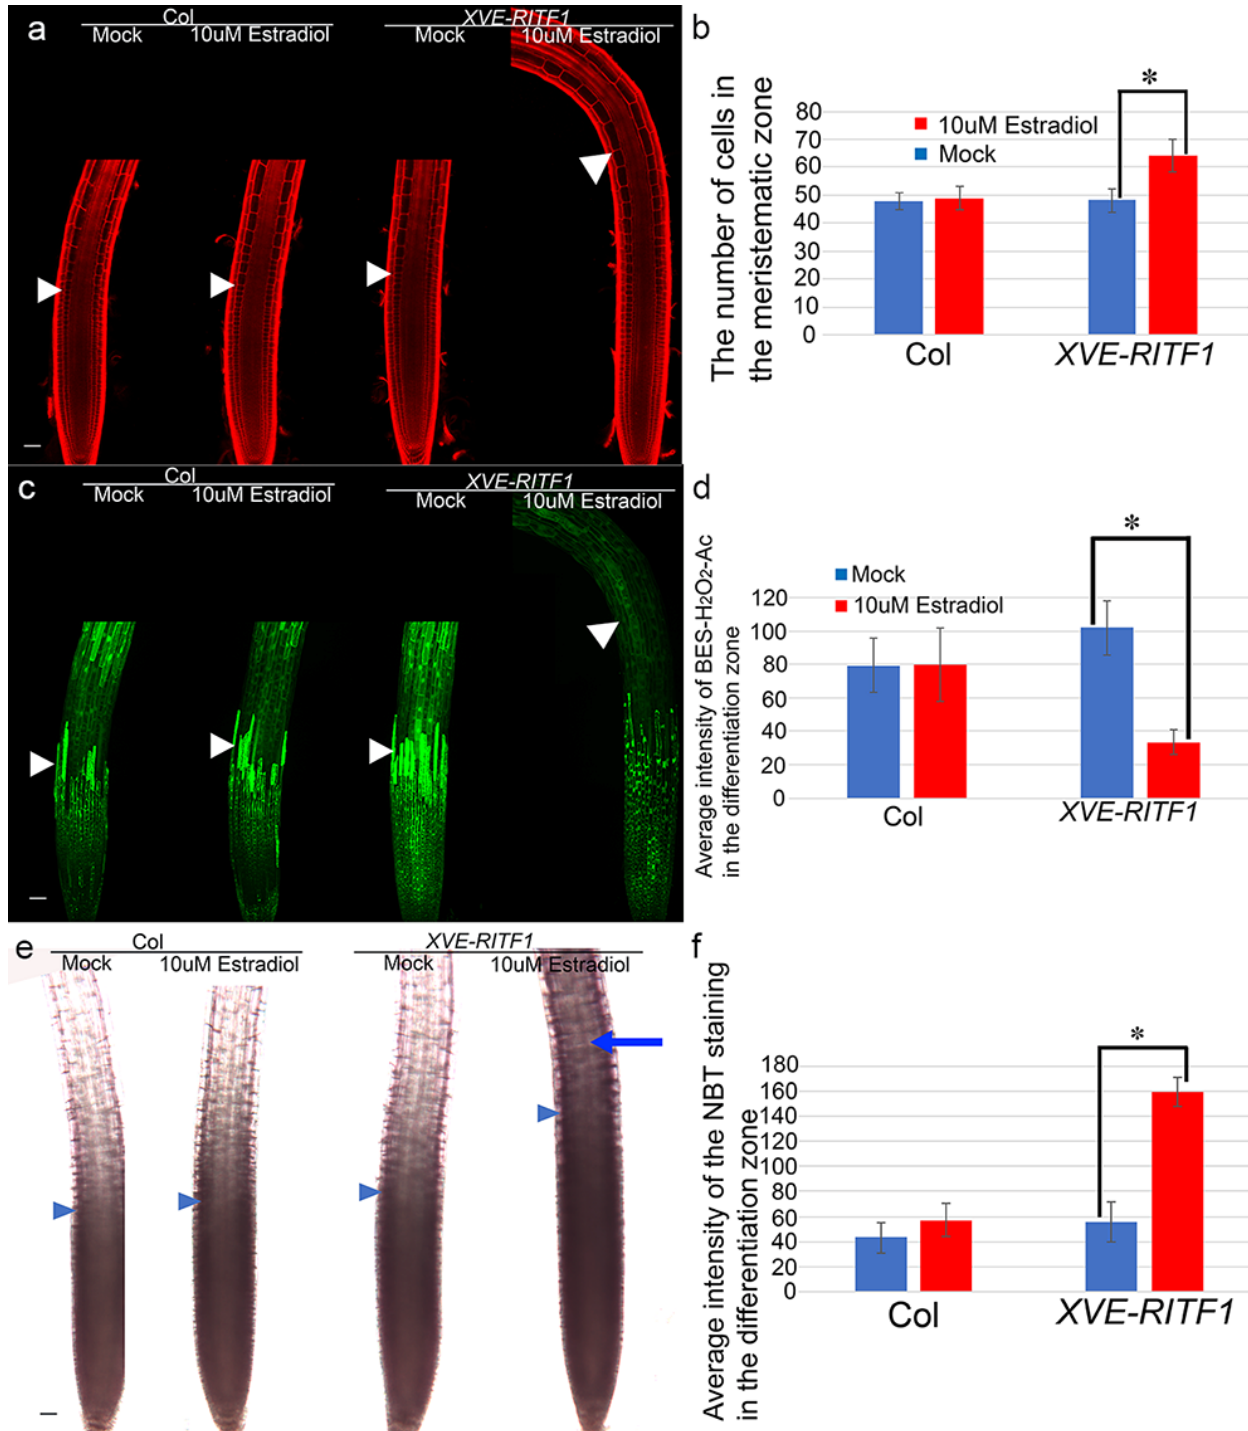

241

242 **Figure 4. Over-expression of *RITF1*.**(a) Confocal images (left WT, right *XVE-RITF1*) of PI

243 stained roots. (b) Number of cells in meristematic zone in wild type (Col) and *XVE-RITF1* 24h

244 after mock or 10μM Estradiol treatment. (N=6, ±SD, and \*p<0.001). (c) Confocal images (left

245 WT, right *XVE-RITF1*) of H<sub>2</sub>O<sub>2</sub>-BES-Ac stained roots. (d) Average intensity of BES-H<sub>2</sub>O<sub>2</sub>-Ac in  
246 differentiation zone 24h after mock or 10μM Estradiol treatments. (N=6, ±SD, and \*p<0.001).  
247 (e) Light microscope images of NBT stained roots. Seedlings were grown on MS agar plates for  
248 seven days before mock or 10μM estradiol treatment. (f) Average intensity of NBT staining in  
249 differentiation zone 24h after mock or 10μM Estradiol treatments. (N≥7, ±SD, and \*p<0.001).  
250 Scale bar=50μm. White and blue arrow heads show the junction between the meristematic zone  
251 and the elongation zone.

## 252 **Methods:**

### 253 **Plant materials and growth conditions**

254 All *Arabidopsis* mutants and marker lines used in this research are in the Columbia-0 (Col-0)  
255 background. The T-DNA insertion line *ritf1* (SALK\_081503C) was obtained from the  
256 Arabidopsis Biological Resource Center at Ohio State University. The T-DNA insertion was  
257 identified at 787 bp downstream of the transcription start site in the *ritf1* mutant. Seeds were  
258 surface sterilized using 50% (vol/vol) bleach and 0.1% Tween20 (Sigma) for 15 min and then  
259 rinsed five times with sterile water. All seeds were plated on standard MS media (1× Murashige  
260 and Skoog salt mixture, Caisson Laboratories), 0.5 g/L MES, 1% Sucrose, and 1% Agar (Difco)  
261 and adjusted to pH 5.7 with KOH. All plated seeds were stratified at 4°C for 2 d before  
262 germination. Seedlings were grown on vertically positioned square plates in a Percival incubator  
263 with 16 h of daily illumination at 22 °C.

264

### 265 **Detecting *gPLT2-YFP* and ROS signals**

266 The seedlings of wild type and the *rgfr1/2/3* mutant were grown for six days on MS agar plates,  
267 then transferred to MS agar plates containing either water (mock) or 20 nM synthetic sulfated

268 RGF1 peptide (Invitrogen). After RGF1 treatment, seedlings were stained for 2 min in a solution  
269 of 200 $\mu$ M NBT in 20mM phosphate buffer (pH 6.1) in the dark and rinsed twice with distilled  
270 water. For hydrogen peroxide detection with BES-H<sub>2</sub>O<sub>2</sub>-Ac<sup>16</sup>, seedlings were incubated in 50 $\mu$ M  
271 of BES-H<sub>2</sub>O<sub>2</sub>-Ac (WAKO) for 30 min in the dark, then were mounted in 10 mg/mL propidium  
272 iodide (PI) in water<sup>2</sup>. Roots were observed using a 20 $\times$  objective lens under a Zeiss LSM 880  
273 laser scanning confocal microscope. Excitation and detection windows were set as follows: BES-  
274 H<sub>2</sub>O<sub>2</sub>-Ac, excitation at 488nm and detection at 500-550 nm; PI staining, excitation at 561 nm and  
275 detection at 570-650 nm. Confocal images were processed, stitched, and analyzed using the Fiji  
276 package of ImageJ<sup>17</sup>. The maximum projection image was produced from the z-section images of  
277 BES-H<sub>2</sub>O<sub>2</sub>-Ac staining. The average intensity of BES-H<sub>2</sub>O<sub>2</sub>-Ac in the meristematic zone was  
278 measured in 5 or 6 roots with three biological replicates. Images for NBT staining were obtained  
279 using a 10x objective lens under a Leica DM5000-B light microscope. The total intensities of  
280 NBT staining in the meristematic zone were measured in 10 roots with three biological replicates  
281 using the Fiji software package<sup>17</sup>.

282 For shorter time course experiments, seedlings of *gPLT2-YFP*<sup>11</sup> were grown on MS agar plates  
283 for 6 days, then transferred to MS agar plates containing either water (mock) or 100nM RGF1  
284 peptide. At 6, 8, and 10h after transfer to RGF1 plates, images were taken with a confocal or  
285 light microscope after PI, NBT, and BES-H<sub>2</sub>O<sub>2</sub>-Ac staining, as previously described.

286

### 287 **Total RNA preparation, RNA amplification and library preparation for RNA-seq**

288 The *HYP2-GFP*<sup>10</sup> lines were grown on MS plates for 6 days. *HYP2-GFP* seedlings were then  
289 transferred into liquid MS media and treated with water (mock) or 100nM RGF1 peptide in 6-  
290 well-plates for 1h. After 1h treatment with mock or RGF1, the seedlings were taken out of liquid

291 MS media and transferred onto a 2% agarose plate. Using an ophthalmic scalpel (Feather), the  
292 meristematic zone of the seedlings was precisely dissected based on *HYP2-GFP* fluorescence as  
293 detected under a dissecting microscope (Axio Zoom, Zeiss). Total RNA was extracted from 20  
294 root sections treated with mock or 100nM RGF1 using the RNeasy Micro Kit (Qiagen). For each  
295 treatment, three replicates of the RNA extractions were performed. All total RNA samples were  
296 treated with DNaseI during RNA extraction. RNA quality was examined using a 2100  
297 Bioanalyzer (Agilent). The RNA Integrity Number (RIN) was over 9.0 in all samples. The  
298 concentration of total RNA was measured by a Qubit (Invitrogen) instrument. For each replicate,  
299 50ng total RNA was amplified using the Ovation RNA-seq System V2 (NuGEN). Following  
300 amplification, 3µg of cDNA was fragmented using the Covaris S-Series System. 400ng of the  
301 fragmented cDNA with an average size of 400bp was used for library preparation using the  
302 Ovation Ultralow System V2 (NuGEN). Illumina sequencing was performed at the Duke  
303 Genome Sequencing Shared Resource. The libraries for three biological replicates of mock and  
304 RGF1 treated meristematic zones were sequenced on an Illumina HiSeq2000 (100 base-paired  
305 reads).

306

### 307 **Differential expression analysis following RGF1 peptide treatment**

308 Illumina sequencing reads were mapped to TAIR10 Arabidopsis genome using Tophat V2.0.7.  
309 The parameters used for mapping are as follows :“-N 5 --read-gap-length 5 --read-edit-dist 5 --  
310 b2-sensitive -r 100 --mate-std-dev 150 -p 5 -i 5 -I 15000 --min-segment-intron 5 --max-segment-  
311 intron 15000 --library-type fr-unstranded”. To select properly mapped reads with unique  
312 mapping positions, only alignments with flag of 83, 99, 147 or 163 and a mapping quality score  
313 of 50 were kept for further analysis. Mapping positions of these reads were compared with the



314 Araport11 genome annotation

315 ([https://www.araport.org/downloads/Araport11\\_Release\\_201606/annotation](https://www.araport.org/downloads/Araport11_Release_201606/annotation)) using HTseq-count

316 generated read count per gene with parameters “--stranded=no --mode=intersection-nonempty”.

317 The raw read counts of miRNA, lncRNA and protein coding genes were then used as input into

318 DESeq2 for differential gene expression analysis. Genes with an adjusted p-value less than or

319 equal to 0.1 were regarded as differentially expressed between RGF treatment and mock. The

320 enriched gene ontology groups among differentially expressed genes were identified as

321 Differences using agriGO (downloaded from <http://geneontology.org>). A customized GO

322 annotation was used that required a significance level of 0.01 and a minimum mapping entry of

323 10.

324

### 325 **Plasmid Construction**

326 The coding sequence of the *RITF1* gene (AT2G12646) was amplified using the Phusion High-

327 Fidelity DNA polymerase (New England Biolabs) from a wildtype cDNA library, and then sub-

328 cloned into the *pENTR/D/TOPO* vector (Invitrogen). The following primers were used for *RITF1*

329 amplification: 5'-CACCATGGGAATTCAGAAACCGG-3' and 5'-

330 TTAACAGAGAGGAGATCGTTG-3'. The sequence of the *RITF1* gene in *pENTR/D/TOPO*

331 vector was confirmed by Sanger sequencing. The clone was recombined with the *pMDC7*

332 vector<sup>15</sup> using LR clonase II (Invitrogen) to fuse the estradiol inducible promoter (XVE)<sup>18</sup> and

333 the coding region of the *RITF1* gene.

334

### 335 **Measurement of meristem size and detection of ROS signals after over-expression of the**

336 ***RITF1* gene**

337 The *XVE-RITF1* construct was transformed into wild type (Col). To measure meristem size and  
338 detect ROS signals, two independent lines of *XVE-RITF1* and wild-type were grown on MS  
339 media for six days, then transferred to MS media containing DMSO (Mock) and 10 $\mu$ M  $\beta$ -  
340 estradiol (Sigma). After 24h treatment with mock or estradiol, meristem size and ROS signals  
341 were measured and detected in wild type and the *XVE-RITF1* lines, as described in the previous  
342 section.

343

#### 344 **References:**

- 345 1 Dunand, C., Crevecoeur, M. & Penel, C. Distribution of superoxide and hydrogen  
346 peroxide in Arabidopsis root and their influence on root development: possible  
347 interaction with peroxidases. *New Phytol* **174**, 332-341, doi:10.1111/j.1469-  
348 8137.2007.01995.x (2007).
- 349 2 Tsukagoshi, H., Busch, W. & Benfey, P. N. Transcriptional regulation of ROS controls  
350 transition from proliferation to differentiation in the root. *Cell* **143**, 606-616,  
351 doi:10.1016/j.cell.2010.10.020 (2010).
- 352 3 Matsuzaki, Y., Ogawa-Ohnishi, M., Mori, A. & Matsubayashi, Y. Secreted peptide  
353 signals required for maintenance of root stem cell niche in Arabidopsis. *Science* **329**,  
354 1065-1067, doi:10.1126/science.1191132 (2010).
- 355 4 Whitford, R. *et al.* GOLVEN secretory peptides regulate auxin carrier turnover during  
356 plant gravitropic responses. *Dev Cell* **22**, 678-685, doi:10.1016/j.devcel.2012.02.002  
357 (2012).

- 358 5 Meng, L., Buchanan, B. B., Feldman, L. J. & Luan, S. CLE-like (CLEL) peptides control  
359 the pattern of root growth and lateral root development in Arabidopsis. *Proc Natl Acad*  
360 *Sci U S A* **109**, 1760-1765, doi:10.1073/pnas.1119864109 (2012).
- 361 6 Shinohara, H., Mori, A., Yasue, N., Sumida, K. & Matsubayashi, Y. Identification of  
362 three LRR-RKs involved in perception of root meristem growth factor in Arabidopsis.  
363 *Proc Natl Acad Sci U S A* **113**, 3897-3902, doi:10.1073/pnas.1522639113 (2016).
- 364 7 Song, W. *et al.* Signature motif-guided identification of receptors for peptide hormones  
365 essential for root meristem growth. *Cell Res* **26**, 674-685, doi:10.1038/cr.2016.62 (2016).
- 366 8 Ou, Y. *et al.* RGF1 INSENSITIVE 1 to 5, a group of LRR receptor-like kinases, are  
367 essential for the perception of root meristem growth factor 1 in Arabidopsis thaliana. *Cell*  
368 *Res* **26**, 686-698, doi:10.1038/cr.2016.63 (2016).
- 369 9 Aida, M. *et al.* The PLETHORA genes mediate patterning of the Arabidopsis root stem  
370 cell niche. *Cell* **119**, 109-120, doi:10.1016/j.cell.2004.09.018 (2004).
- 371 10 Ishida, T. *et al.* SUMO E3 ligase HIGH PLOIDY2 regulates endocycle onset and  
372 meristem maintenance in Arabidopsis. *Plant Cell* **21**, 2284-2297,  
373 doi:10.1105/tpc.109.068072 (2009).
- 374 11 Galinha, C. *et al.* PLETHORA proteins as dose-dependent master regulators of  
375 Arabidopsis root development. *Nature* **449**, 1053-1057, doi:10.1038/nature06206 (2007).
- 376 12 Kurepa, J. & Smalle, J. A. To misfold or to lose structure?: Detection and degradation of  
377 oxidized proteins by the 20S proteasome. *Plant Signal Behav* **3**, 386-388 (2008).
- 378 13 Shringarpure, R., Grune, T., Mehlhase, J. & Davies, K. J. Ubiquitin conjugation is not  
379 required for the degradation of oxidized proteins by proteasome. *J Biol Chem* **278**, 311-  
380 318, doi:10.1074/jbc.M206279200 (2003).

- 381 14 Li, S., Yamada, M., Han, X., Ohler, U. & Benfey, P. N. High-Resolution Expression Map  
382 of the Arabidopsis Root Reveals Alternative Splicing and lincRNA Regulation. *Dev Cell*  
383 **39**, 508-522, doi:10.1016/j.devcel.2016.10.012 (2016).
- 384 15 Curtis, M. D. & Grossniklaus, U. A gateway cloning vector set for high-throughput  
385 functional analysis of genes in planta. *Plant Physiol* **133**, 462-469,  
386 doi:10.1104/pp.103.027979 (2003).
- 387 16 Maeda, H. *et al.* Fluorescent probes for hydrogen peroxide based on a non-oxidative  
388 mechanism. *Angew Chem Int Ed Engl* **43**, 2389-2391, doi:10.1002/anie.200452381  
389 (2004).
- 390 17 Schindelin, J. *et al.* Fiji: an open-source platform for biological-image analysis. *Nat*  
391 *Methods* **9**, 676-682, doi:10.1038/nmeth.2019 (2012).
- 392 18 Zuo, J., Niu, Q. W. & Chua, N. H. Technical advance: An estrogen receptor-based  
393 transactivator XVE mediates highly inducible gene expression in transgenic plants. *Plant*  
394 *J* **24**, 265-273 (2000).

395 **Supplementary Information** is available in the online version of the paper.

396 **Acknowledgments:**

397 We thank Jazz Dickinson, Edith Pierre-Jerome, Kevin Lehner, and Cara Winter for comments  
398 on the manuscript; Carmen Wilson for help with generating overexpression lines; Keiko  
399 Sugimoto for *HYP2-GFP* seed; Yoshikatsu Matsubayashi for the triple mutants of *rgf1/2/3* and  
400 *rgfr1/2/3*; Renze Heidstra for *gPLT2-YFP* and *pPLT2-CFP* seed; Nam-Hai Chua for pMDC7  
401 vector; the Duke Genome Sequencing Center for sequencing the Illumina libraries. This work  
402 was funded by the Howard Hughes Medical Institute and the Gordon and Betty Moore  
403 Foundation (through Grant GBMF3405) and from the NIH (R01-GM043778).

404 **Author contributions:**

405 M.Y. and P.N.B. conceptualized the study; M.Y. performed all experiments; X.H. performed  
406 the computational analyses; all authors wrote the paper.

407 **Author information:**

408 Reprints and permissions information is available at [www.nature.com/reprint](http://www.nature.com/reprint). The authors  
409 declare competing financial interests: details are available in the online version of the paper.

410 Readers are welcome to comment on the online version of the paper. Correspondence and  
411 requests for materials should be addressed to P.N.B. ([philip.benfey@duke.edu](mailto:philip.benfey@duke.edu)).

412
